**Quantifying and modelling the acquisition and retention of lumpy skin disease virus by haematophagus insects reveals clinically but not subclinically-affected cattle are promoters of viral transmission and key targets for control of disease outbreaks.**

Beatriz Sanz-Bernardo<sup>1</sup>, Ismar R. Haga<sup>1</sup>, Najith Wijesiriwardana<sup>1</sup>, Sanjay Basu<sup>1</sup>, Will Lerner<sup>1</sup>, Adriana V. Diaz<sup>1\*</sup>, Zoë Langlands<sup>1</sup>, Eric Denison<sup>1</sup>, Joanne Stoner<sup>1</sup>, Mia White<sup>1\*</sup>, Christopher Sanders<sup>1</sup>, Philippa C. Hawes<sup>1</sup>, Anthony J. Wilson<sup>1\*</sup>, John Atkinson<sup>3</sup>, Carrie Batten<sup>1</sup>, Luke Alphey<sup>1</sup>, Karin E. Darpel<sup>1</sup>, Simon Gubbins<sup>1†</sup>, Philippa M. Beard<sup>1,2 †,#</sup>

<sup>1</sup> The Pirbright Institute, Ash Road, Pirbright, Surrey, UK

<sup>2</sup> The Roslin Institute, Easter Bush, Edinburgh, UK

<sup>3</sup> MSD Animal Health, Walton Manor, Walton, Milton Keynes, UK

Running Head: Vector-borne transmission of lumpy skin disease virus

<sup>†</sup> These authors contributed equally to this study.

<sup>#</sup>Address correspondence to Philippa M. Beard, [pip.beard@pirbright.ac.uk](mailto:pip.beard@pirbright.ac.uk).

## 1 **Abstract**

2 Lumpy skin disease virus (LSDV), is a vector- transmitted poxvirus that causes disease in  
3 cattle. The vector species involved in LSDV transmission and their ability to acquire and  
4 transmit the virus are poorly characterised. Using a highly representative bovine  
5 experimental model of lumpy skin disease we fed four model vector species (*Aedes aegypti*,  
6 *Culex quinquefasciatus*, *Stomoxys calcitrans* and *Culicoides nubeculosus*) on LSDV-inoculated  
7 cattle in order to examine the acquisition and retention of LSDV by these species. We found  
8 the probability of LSDV transmission from clinical cattle to vector correlated with disease  
9 severity. Subclinical disease was more common than clinical disease in the inoculated cattle,  
10 however the probability of vectors acquiring LSDV from subclinical animals was very low.

11 All four potential vector species studied had a similar rate of acquisition of LSDV after  
12 feeding on the host, but *Aedes aegypti* and *Stomoxys calcitrans* retained the virus for a  
13 longer time, up to 8 days. There was no evidence of virus replication in the vector,  
14 consistent with mechanical rather than biological transmission. The parameters obtained in  
15 this study were combined with data from previously published studies of LSDV transmission  
16 and vector life history parameters to determine the basic reproduction number of LSDV in  
17 cattle mediated by each of the model species. This was highest for *Stomoxys calcitrans*  
18 (19.1), *C. nubeculosus* (7.4), and *Ae. aegypti* (2.4), indicating these three species are  
19 potentially efficient transmitters of LSDV, which can be used to inform LSD control  
20 programmes.

21

## 22 **Importance**

23 Lumpy skin disease virus (LSDV) causes a severe systemic disease characterised by  
24 cutaneous nodules in cattle. LSDV is a rapidly emerging pathogen, having spread since 2012

25 from Africa and the Middle East into Europe, Russia, and across Asia. The vector-borne  
26 nature of LSDV transmission is believed to have promoted the rapid geographic spread of  
27 the virus, however a lack of quantitative evidence about LSDV transmission has hampered  
28 effective control of the disease during the current epidemic. Our research has combined  
29 experimental and modelling approaches in order to calculate the reproductive number of  
30 different insect species, therefore identifying efficient transmitters of LSDV. It has also  
31 characterised a subclinical form of LSDV in cattle and shown that these animals play little  
32 part in virus transmission. This information can be used to devise evidence-based,  
33 proportionate, and effective control programmes for LSD.

34

35

36 **Key words:** poxvirus, lumpy skin disease, transmission, mosquitoes, flies, midges, basic  
37 reproduction number, vector, control, *Aedes aegypti*, *Culex quinquefasciatus*, *Stomoxys*  
38 *calcitrans*, *Culicoides nubeculosus*

## 39 Introduction

40 Lumpy skin disease virus (LSDV) is a large DNA virus of the family *Poxviridae* and the  
41 etiological agent for lumpy skin disease (LSD) in cattle. LSDV is a rapidly emerging pathogen  
42 that is mechanically transmitted by vectors. First described in Zambia in cattle in 1929, LSDV  
43 subsequently spread throughout Africa and into the Middle East (1). In the past decade the  
44 virus has increased its geographical coverage substantially, entering and spreading within  
45 Europe and Asia including Russia, India, Bangladesh, Taiwan and China (2-8). This rapid  
46 expansion of LSDV distribution has focused attention on improving our knowledge of LSDV  
47 transmission, in order to counter the spread of the virus.

48 LSD is characterised by fever, weight loss, and prominent multifocal necrotising cutaneous  
49 lesions (9), and affects cattle of all ages (10). Morbidity in disease outbreaks ranges from 5-  
50 26%, and mortality 0.03-2% (2-4, 11-13). Control measures include vaccination, quarantine  
51 and partial or complete culling of infected herds. LSD outbreaks and the subsequent control  
52 measures cause significant negative economic and welfare impacts in endemic (14-16) and  
53 epidemic (17) situations, resulting in food insecurity for affected communities.

54 Haematophagus dipterans (referred to in this work as “blood-feeding insects”), particularly  
55 *Stomoxys calcitrans*, have been associated with outbreaks of LSDV (7, 18-20). In addition,  
56 experimental transmission of LSDV from affected to naïve animals (defined by the presence  
57 of clinical disease and/or detection of systemic LSDV antigen and/or capripoxvirus-specific  
58 antibodies) has been demonstrated via the mosquito *Aedes aegypti* (21), the ticks  
59 *Rhipicephalus appendiculatus* (22-24), *Rhipicephalus decoloratus* (25), *Amblyomma*  
60 *hebraeum* (26), the stable fly *Stomoxys calcitrans*, horseflies *Haematopota* spp. and other  
61 *Stomoxys* species (27, 28). LSDV DNA has also been detected in other species after feeding

62 on infected cattle or an infectious blood meal (*Culex quinquefasciatus*, *Anopheles stephensi*,  
63 *Culicoides nubeculosus*) (29), or in field-caught pools (*Culicoides punctatus*) (4). However  
64 transmission of LSDV to susceptible animals has not been confirmed for these species. To  
65 date the mode of LSDV arthropod transmission has been assumed to be mechanical as no  
66 evidence of active virus replication in insects or ticks has been found (30).

67 Despite growing evidence of the potential participation of different arthropods in the  
68 transmission of the LSDV, there is an important gap in understanding how efficient each  
69 vector is in contributing to the transmission of LSDV.

70 LSDV can be detected in skin lesions, blood (primarily in peripheral blood mononuclear  
71 cells), and in nasal, oral and ocular excretions of infected cattle (27, 31, 32). Viraemia is  
72 considered of short duration and relatively low level, though the virus can survive for longer  
73 periods of time in skin lesions (31). LSDV has also been detected in seminal fluid of diseased  
74 bulls (33), making venereal transmission a possibility (34-36). Subclinical infections  
75 (detection of LSDV in animals without cutaneous lesions) (3, 27, 32) and resistance to LSDV  
76 (absence of LSDV and cutaneous lesions following experimental challenge) have been  
77 reported, but both are poorly documented. The contribution of subclinical LSD to the  
78 transmission of the virus is unclear and a topic of controversy when implementing control  
79 measures such as whole-herd culling, particularly when morbidity is low (37, 38).

80 Previous research has assessed if LSDV transmission can occur when mediated by different  
81 insects. These studies cannot be solely used to assess the risk of transmission as they were  
82 designed with a variety of weaknesses (reduced number of donor cattle and times post-  
83 infection, use of virus-spiked blood meals and/or reduced number of insects assayed)  
84 resulting in large uncertainty in the parameter estimates. In this study we used new

85 approach to address these weaknesses, incorporating published and new experimental data  
86 on LSDV transmission and vector biology. Using our experimental LSD model in cattle we  
87 calculated biologically relevant parameters for the mechanical transmission of LSDV using  
88 four blood-feeding insect species previously reported to acquire LSDV (*S. calcitrans*, *Ae.*  
89 *aegypti*, *Cx. quinquefasciatus* and *C. nubeculosus*). These transmission parameters were  
90 used to understand the risk of transmission of the virus from experimentally infected cattle  
91 to each model species, and then were combined with data from previous studies to  
92 determine the basic reproduction number for each species.

## 93 **Results**

### 94 **Experimental infection of calves with LSDV**

#### 95 ***Experimental inoculation of calves with LSDV results in clinical and subclinical disease.***

96 Eight calves were challenged by intravenous and intradermal inoculation of LSDV in order to  
97 act as donors on which blood-feeding insects could feed. The clinical and pathological  
98 findings have been described previously (9), and resemble those of naturally infected cattle  
99 (2, 4, 8, 11, 12, 37). Three calves (calves 3, 5, and 9) developed lumpy skin disease,  
100 characterised by severe multifocal dermatitis with necrotising fibrinoid vasculitis consistent  
101 with field reports of LSD (Figure S1A). The cutaneous lesions initially appeared in close  
102 proximity to the inoculation site at 5 days post challenge (dpc) for calves 5 and 9, and at  
103 distant sites in all three clinical calves at 7 dpc. The five remaining calves (calves 2, 4, 7, 8  
104 and 10) did not develop lesions other than at the inoculation sites (Figure S1B). All eight  
105 inoculated calves developed a fever which was more prolonged in calves with clinical signs  
106 (Figure S1C). Superficial lymph nodes, predominantly the superficial cervical lymph node,  
107 were enlarged in both groups starting between 2-5 dpc, with larger lymph nodes present in

108 clinical compared to subclinical calves (Figure S1D). Two non-inoculated in-contact calves  
109 (calves 1 and 6) were included in the study and did not develop any clinical signs or lesions  
110 consistent with LSD.

111 ***LSDV DNA can be detected in blood and skin of clinical and subclinical calves.*** In the three  
112 clinically-affected calves viral DNA was first detected in the blood by qPCR at 5 dpc and  
113 remained detectable in all subsequent blood samples (up to 19 dpc). Peak viral DNA levels in  
114 the blood (6.9, 5.3 and 5.3 log<sub>10</sub> copies/ml in calves 3, 5 and 9, respectively) were reached at  
115 11 dpc (Figure 1). By contrast, viral DNA was detected only intermittently in the blood of  
116 four (out of five) subclinically infected calves between 5 dpc and 19 dpc. In addition,  
117 genome copy numbers were lower (median: 2.1 log<sub>10</sub> copies/ml; range: 1.2 to 2.4 log<sub>10</sub>  
118 copies/ml) than those in clinically-affected calves (Figure 1). Although negative for LSDV in  
119 whole blood, the peripheral blood mononuclear cell (PBMC) fraction of calf 7 was positive  
120 for viral DNA on days 7, 9 and 19 post challenge (Data S1). These results indicate that clinical  
121 calves had had more viral DNA present in the blood, and for longer compared to subclinical  
122 calves. However, LSDV DNA could be detected at least once in all eight challenged animals  
123 between 5 and 19 dpc.

124 Skin biopsies of cutaneous lesions taken at 7 dpc (calf 9) or 9 dpc (calves 3 and 5) contained  
125 abundant viral genomes as measured by qPCR (Figure 1). Viral DNA was detected in all  
126 subsequent biopsy samples, with the quantities detected remaining at an approximately  
127 constant level for the duration of the experiment (Figure 1). The amount of viral DNA  
128 present in the skin lesions varied between the three clinical calves in an analogous fashion  
129 to the viral DNA in blood, with the highest concentration of viral DNA detected in skin  
130 lesions of calf 3 and least in calf 9 (Figure 1). The peak level of viral DNA in skin was reached

131 after the peak level of viral DNA in blood in all three calves (Figure 1). Viral DNA was  
132 detected at three time points in biopsies of normal skin from one subclinical calf (calf 4) at a  
133 lower copy number than in the clinically-affected animals; skin biopsies from the other  
134 subclinical animals (calves 2, 7, 8 and 10) were all negative for LSDV DNA (Figure 1).

135 ***Infectious LSDV is present in larger quantities in the skin compared to blood.*** Both skin  
136 homogenate and PBMC suspension collected between 5 and 19 dpc from clinical calves  
137 were titrated to determine the quantity of live virus in these tissues. Although units of  
138 measurement are not directly comparable between sample types (i.e. skin vs PBMC), they  
139 are representative of the magnitude of exposure that haematophagus insects may  
140 encounter during feeding (i.e. mg of skin tissue and  $\mu\text{l}$  of blood). In all calves the viral titre  
141 from skin homogenate was higher and more constant than from PBMC suspension (Figure  
142 2). Live virus was detected for six consecutive days from 5 dpc in the PBMC fraction of calf 3,  
143 whereas in calves 5 and 9 the virus was isolated only in three and two days (respectively)  
144 starting at day 7 post challenge. In contrast, all skin samples except one taken from dermal  
145 lesions contained live LSDV with a maximum titre of  $10^{4.3}$  PFU/mg skin, which is over  $10^3$ -  
146 fold greater than the maximum level of virus detected in PBMCs, emphasising the strong  
147 cutaneous tropism of LSDV. Biopsies collected from normal skin of clinical calves were  
148 negative for live virus (i.e. below  $10^{-2}$  PFU/mg, Data S1) suggesting the virus is highly  
149 concentrated in the skin lesions of clinical animals. Live virus was not detected in blood or  
150 skin from subclinical animals (including samples which were qPCR positive).

151 ***Humoral response to LSDV inoculation.*** Serum from the three clinically-affected calves  
152 contained antibodies to LSDV at 15-17 dpc as determined by a commercial ELISA test. By the  
153 end of the study period all subclinical animals had also developed detectable LSDV



154 antibodies at levels lower than those observed in the clinical animals, but above those of the  
155 non-challenged controls (Figure S1E). The presence of detectable levels of antibodies  
156 confirmed exposure to the virus in all eight challenged animals, although the clinical  
157 outcome of challenge varied widely between the eight calves.

#### 158 **Acquisition and retention of LSDV by blood-feeding insects after feeding on donor cattle**

159 We next studied the influence of this disease spectrum on the acquisition and retention of  
160 LSDV in blood-feeding insects. To assess the acquisition and retention of LSDV by blood-  
161 feeding insects, all eight challenged animals were exposed to two mosquito species, *Ae.*  
162 *aegypti* and *Cx. quinquefasciatus*, one species of biting midge, *C. nubeculosus*, and the  
163 stable fly, *S. calcitrans* on days 5, 7, 9, 11, 15, 17 and 19 post challenge. The selected species  
164 are potential mechanical vectors with different feeding mechanisms (39), covering those  
165 which will feed readily on cattle (*i.e.* *S. calcitrans*), as well as species models for Culex and  
166 Aedes mosquitoes (40, 41) and also biting midges (42, 43) which would feed on cattle. At  
167 each time point, a pot of insects of each species (*i.e.* four pots in total) was placed on a  
168 separate cutaneous nodule on a clinical animal and, a corresponding area of normal skin on  
169 a subclinical animal. Blood engorgement, as a measure for detection of insect biting activity,  
170 was assessed visually. A subset of the insects from each pot was tested for the presence of  
171 LSDV DNA by qPCR at 0, 1, 2, 4 and 8 days post feeding (dpf) (Figure S2). The smaller  
172 numbers of insects tested at the later time points reflect the lower numbers surviving for  
173 long enough to be tested.

174 Different models for the proportion of positive insects were compared to assess differences  
175 in: (i) the probability of transmission from bovine to insect (*i.e.* of acquiring LSDV) amongst  
176 insect species and between clinical and subclinical donors; and (ii) the duration of viral

177 retention amongst insect species (Table S1). Models were compared using the deviance  
178 information criterion (DIC), with a model having a lower DIC preferred to one with a higher  
179 DIC. Positive insects were those with LSDV DNA amplification by qPCR.

180 ***Probability of transmission from bovine to insect.*** A total of 3178 insects were fed on the  
181 eight donor calves (over 7 feeding sessions), of which 180 were positive for viral DNA when  
182 tested. A higher proportion of insects were positive after feeding on a clinical donor (173  
183 out of 1159) compared to feeding on a subclinical donor (7 out of 2019) (Figure S2).  
184 Comparing the proportion of positive insects for each species after feeding in clinical and  
185 subclinical calves (Figure 3) revealed that the probability of transmission from bovine to  
186 insect (i.e. of acquiring LSDV) does not differ amongst the four insect species, but that this  
187 probability does differ between clinical and subclinical donors (Table S1). For a clinical  
188 donor, the probability of transmission from bovine to insect was estimated (posterior  
189 median) to be 0.22, while for a subclinical donor it was estimated to be 0.006 (Table 1). This  
190 means that an insect feeding on a subclinical animal is 97% less likely to acquire LSDV than  
191 an insect feeding on a clinical one (Table 1; Figure 3).

192 ***Infectiousness correlates with the level of viral DNA in blood and skin.*** The relationship  
193 between the level of viral DNA in the skin or blood of a calf and the proportion of virus-  
194 positive insects resulting from a feeding session was examined. For each feeding session  
195 that took place on the three clinical calves, the proportion of insects containing viral DNA  
196 post-feeding was calculated and compared to the viral DNA copy number present in both  
197 the blood sample and the skin biopsy taken from the calf on that day (Figure 4). This  
198 revealed a dose-response relationship between the levels of viral DNA in skin and blood and  
199 the probability of transmission from bovine to insect (or “donor infectiousness”).

200 Furthermore, this relationship was the same for all four insect species (Table S1),  
201 irrespective of their different feeding mechanisms. The relationship differed between levels  
202 of viral DNA in blood and skin (Table 2; Figure 4), with the probability of transmission being  
203 higher when the level of viral DNA in blood was used compared to skin (Figure 4). The fits of  
204 the models using levels of viral DNA in blood or skin are similar, suggesting that both are  
205 acceptable proxy measures for infectiousness of the donor.

206 Combining the dose-response relationship (Figure 4) with the time course for levels of viral  
207 DNA in blood or skin for each calf (Figure 1) shows how the infectiousness of an animal  
208 changes over time and how it varies amongst animals (Figure 1, right-hand column). This  
209 highlights the very low probability of transmission from bovine to insect ( $<0.01$  at all time  
210 points; cf. estimate in Table 1) for calves which were only subclinically infected. In addition,  
211 for those calves which did develop clinical signs, there were differences in both the timing  
212 and level of infectiousness amongst the calves, which is a consequence of the underlying  
213 differences in viral dynamics in each animal. This is reflected in both the changes over time  
214 in the proportion of insects acquiring virus after feeding and differences in this proportion  
215 amongst clinical calves (Figure S3).

216 ***Duration of LSDV retention.*** Viral DNA was detected in *Ae. aegypti* and *S. calcitrans* up to 8  
217 dpf, in *C. nubeculosus* up to 4 dpf and in *Cx. quinquefasciatus* up to 2 dpf (Figure 3).  
218 However, few *Cx. quinquefasciatus* mosquitoes survived to 4 or 8 dpf (Figure S2), resulting  
219 in uncertainty about the duration of retention in this species (Figures 3 & 4). The mean  
220 duration of viral retention differed amongst the four insect species in the present study  
221 (Figure 3; Table S1), being the longest for *Ae. aegypti* (5.9 days) and *S. calcitrans* (5.5 days),  
222 followed by *Cx. quinquefasciatus* (4.5 days), and *C. nubeculosus* (2.4 days) (Figure 3; Table

223 1). The corresponding virus inactivation rate (i.e. the reciprocal of the mean duration of  
224 retention) was 0.17/day for *Ae. aegypti* and 0.18/day for *S. calcitrans*, 0.22/day for *Cx.*  
225 *quinquefasciatus* and 0.42/day for *C. nubeculosus* (Table 1).

226 **Levels of retained LSDV.** The median amount of viral DNA in homogenized whole insects  
227 was the same when tested at different days post feeding for three (out of the four) species:  
228 *Ae. aegypti* (Kruskal-Wallis test:  $\chi^2=0.98$ ,  $df=4$ ,  $P=0.91$ ), *Cx. quinquefasciatus* (Kruskal-Wallis  
229 test:  $\chi^2=3.62$ ,  $df=2$ ,  $P=0.16$ ) or *S. calcitrans* (Kruskal-Wallis test:  $\chi^2=2.74$ ,  $df=4$ ,  $P=0.60$ ) (Figure  
230 S3). However, the median level of viral DNA was lower for individual *C. nubeculosus* tested  
231 at later times post feeding (Kruskal-Wallis test:  $\chi^2=10.8$ ,  $df=3$ ,  $P=0.01$ ) (Figure S4). These  
232 results are consistent with a mechanical rather than a biological form of vector-  
233 transmission.

#### 234 **Probability of transmission from insect to bovine**

235 Three previous studies have investigated the transmission of LSDV from insects to cattle,  
236 where insects of species included in the present study were allowed to feed on an infected  
237 donor and were subsequently allowed to refeed on a naïve recipient (21, 27, 29). The  
238 number of positive insects refeeding was not determined in these studies. By combining  
239 LSDV acquisition and retention results of the present study with challenge outcomes of the  
240 aforementioned studies (i.e. whether or not transmission occurred), it is possible to  
241 estimate the probability of transmission from insect to bovine. This probability was highest  
242 for *Ae. aegypti* (0.56), intermediate for *C. nubeculosus* (0.19) and *Cx. quinquefasciatus* (0.11)  
243 and lowest for *S. calcitrans* (0.05) (Table 1). However, there is considerable uncertainty in  
244 the estimates for all species, but especially for *Ae. aegypti*, *C. nubeculosus* and *Cx.*  
245 *quinquefasciatus* (Table 1), which makes it difficult to compare estimates across species.

## 246 **Basic reproduction number for LSDV**

247 The basic reproduction number ( $R_0$ ) is defined as “the average number of secondary cases  
248 caused by an average primary case in an entirely susceptible population” (44). For LSDV,  $R_0$   
249 combines the parameters related to transmission (Table 1) with those related to vector life  
250 history (i.e. biting rate, vector to host ratio and vector mortality rate; see Table 1 in ref. 45)  
251 to provide an overall picture of the risk of transmission by the four insect species (45). The  
252 basic reproduction number was estimated to be highest for *S. calcitrans* (median  $R_0=19.1$ )  
253 (Table 1; Figure 5), indicating that this species is likely to be the most efficient vector of  
254 LSDV and would be able to cause substantial outbreaks if it were the sole vector in a region.  
255 Both *C. nubeculosus* (median  $R_0=7.1$ ) and *Ae. aegypti* (median  $R_0=2.4$ ) are also potentially  
256 efficient vectors of LSDV (i.e.  $R_0>1$  for these species) and would be able to sustain  
257 transmission if either were the sole vector in a region. Finally, *Cx. quinquefasciatus* (median  
258  $R_0=0.6$ ) is likely to be inefficient at transmitting LSDV (Table 1; Figure 5). It would not be able  
259 to sustain transmission on its own, but it could contribute to transmission if other vector  
260 species were also present.

261 Exploring the contribution of clinical and subclinical animals to the basic reproduction  
262 number for each species further emphasises the more limited role played by subclinical  
263 animals in the transmission of LSDV (Figure 5). For all species, the  $R_0$  for clinical animals  
264 alone is very close to that for both clinical and subclinical animals combined (Figure 5).  
265 Moreover, the median  $R_0$  for subclinical animals alone is below one for all species, except *S.*  
266 *calcitrans* (Figure 5).

267 The  $R_0$  values calculated from our data and previous studies provide a summary of the risk  
268 of LSDV transmission. A range of blood-feeding insects are likely to support a disease

269 outbreak by transmitting LSDV from a clinical to a naïve animal, particularly biting flies such  
270 as *S. calcitrans*. The  $R_0$  calculations also highlight that, although there may be a significant  
271 subset of subclinical animals in an affected herd, they are likely to play at most a minor role  
272 in the transmission of the virus.

## 273 **Discussion**

274 This study describes a controlled experimental model of LSD that mimics disease features  
275 described in field outbreaks (2, 4, 8, 11, 12, 37) and other experimental models (27, 32).  
276 Inoculated calves (both clinical and subclinical) were used to measure the acquisition  
277 (transmission from bovine to insect) and retention of LSDV by four potential vector species.  
278 These data were then used to estimate the risk of transmission by these species with the  
279 aim of providing evidence with which to inform decisions during the implementation of  
280 measures to control LSDV.

281 In our experimental model we observed that 37.5% of calves developed generalised LSD  
282 with the remaining 62.5% of calves classified as subclinical (no cutaneous nodules, positive  
283 qPCR in blood (27)). This attack rate of 0.37 is comparable to other experimental models  
284 with field strains of LSDV (0.57 (27) and 0.50 (32)). Reports of animals with subclinical LSD in  
285 the field is sparse, with an incidence of up to 31.3% reported (3). The high detection of  
286 subclinical infection in our study may be a result of an intense sampling protocol (compared  
287 to the limited sampling of individuals during an outbreak investigation). Further  
288 investigation of the true incidence of subclinical LSD in field studies is warranted.

289 Cattle experimentally infected with LSDV, including in our study, have higher concentrations  
290 of LSDV in skin lesions than blood (Figures 1 & 2). In clinically infected animals we identified  
291 a relationship between the viral load in skin and blood and the proportion of insects positive

292 for the virus, indicating both skin and blood are good predictors of the transmissibility of  
293 LSDV from donors to vector. Our study did not extend beyond 21 days post challenge  
294 however, and this observation may only be true during the initial stage of the disease when  
295 the viraemia is detectable. Donors with different disease severity and therefore different  
296 levels of infectiousness would strongly influence the proportion of vectors which acquired  
297 virus. This finding may explain the discrepancies between experimental studies which have  
298 assessed the transmission of LSDV by vectors (21, 29) when the infectiousness of the donors  
299 may have been different.

300 As reported in this study and others (27, 31) LSDV can be detected in the blood of cattle  
301 prior to the appearance of skin lesions, 5-8 dpc. However, during this time, viraemia is  
302 relatively low and in our study few insects were positive for LSDV after feeding (Figure S3).  
303 Viraemia rises and peaks after the multifocal skin lesions appear (at around 7 dpc), and this  
304 is when the probability of transmission from bovine to insect starts to increase (Figure 1).  
305 The probability remains high while viraemia is high and when skin lesions are present. The  
306 appearance of skin lesions therefore marks the start of the risk period for virus transmission,  
307 and this means that rapid diagnosis and consequent implementation of control measures  
308 should be possible and effective at limiting onwards transmission (46, 47). In this study we  
309 were only able to follow the animals for 21 days post-challenge with the last exposure of  
310 blood-feeding insects to infected calves on day 19, and thus the period for transmission risk  
311 could not be established beyond this time point. Nevertheless, under controlled conditions  
312 (31), LSDV has been isolated up to 28 (blood) and 39 (skin) days post-challenge, and  
313 detected by PCR up to 91 days post-challenge (in skin biopsies). Therefore, LSDV uptake by  
314 vectors may occur beyond the reported period in our study.

315 We found that subclinical donors were much less likely than clinical animals to transmit  
316 virus to vectors (Table 1; Figure 3), indicating a substantially reduced role of subclinically  
317 infected animals in the transmission of LSDV. For some vector-borne diseases such as  
318 dengue fever, malaria, asymptomatic and preclinical individuals may be an important source  
319 of the pathogen for vectors and help maintain the transmission cycle (48, 49). The situation  
320 with LSDV appears to be different. The viraemia in subclinical animals is low and skin lesions  
321 (representing the major viral load) are absent in these animals. Few vectors therefore  
322 acquire LSDV from subclinical cattle, and this reduces the chances of onward transmission to  
323 a susceptible host. This is the first time the relative contribution of subclinically infected  
324 cattle to onward transmission of LSDV has been quantified.

325 Lumpy skin disease virus can be mechanically transmitted by stable and horse flies (27, 28)  
326 and mosquitoes (21). Mechanical transmission of viruses by blood-feeding vectors can be  
327 influenced by their feeding mechanism, ecology and biting behaviour. Stable flies are  
328 aggressive feeders with a painful bite which leads to interrupted feeding and to more than  
329 one feeding event per day (50, 51). They are also known to regurgitate previous blood  
330 intakes while feeding. To penetrate the skin, stable flies rotate sharp teeth on their  
331 proboscis (5-8mm long) and form a pool of blood from which they feed (39). *Culicoides*  
332 midges also disrupt the skin barrier using their proboscis (0.1-0.2 mm long). Midges serrate  
333 the skin using saw-like blades on their proboscis that cross over each other to produce a  
334 pool of blood (39). Biting midges feed generally less frequently than stable flies as feeding is  
335 associating to their gonotrophic cycle (7-10 days, but as a temperature-dependent event it  
336 can be as short as 2-3 days) (52). Mosquitoes do not produce pools of blood, instead they  
337 penetrate the skin “surgically” searching for a capillary with their proboscis of (1.5-2.0 mm  
338 long), accompanied by a pushing and withdrawing movement until it hits a capillary from



339 which to withdraw blood <sup>(53)</sup>. Mosquitoes feeding on blood is also associated to their  
340 gonotrophic cycle, but multiple feedings have been reported in some species (54, 55)  
341 Despite these variations in feeding behaviour, all four insect species acquire LSDV at the  
342 same rate, indicating that virus acquisition is not influenced by feeding behaviour.

343 All four insect species in the present study were able to acquire LSDV through feeding on  
344 clinical animals and to retain it for several days (Figure 3). In a small proportion of *Ae.*  
345 *aegypti* and *S. calcitrans* LSDV DNA was still present at 8 days post feeding, which was the  
346 longest we investigated, thus longer retention cannot be ruled out. Similar to our study,  
347 Chihota and co-authors (21), identified that *Ae. aegypti* mosquitoes feeding on animals with  
348 clinical LSD were able to acquire and retained the virus for up to six days, and that the  
349 proportion of virus-positive insects also decreased with days post feeding. They observed  
350 similar dynamics in *Cx. quinquefasciatus* and *Anopheles stephensi* mosquitoes when using a  
351 membrane-feeding system with a LSDV-infected bloodmeal, but when they fed *C.*  
352 *nubeculosus* and *S. calcitrans* on LSDV-infected calves they did not detect the virus beyond  
353 the day of feeding (*C. nubeculosus*) or the following day (*S. calcitrans*) (29). However, we  
354 now know that disease severity of the donor can influence the acquisition of LSDV by an  
355 insect. This could result in the lower acquisition and retention observed by Chihota et al. In  
356 our work we identified that LSDV can be retained longer than previously reported in *S.*  
357 *calcitrans* and *C. nubeculosus*, with a decline in virus DNA post-feeding only detectable for *C.*  
358 *nubeculosus*.

359 For LSDV, as for other chordopoxviruses including capripox virus, fowlpox virus and myxoma  
360 virus, the mode of vector-mediated transmission is assumed to be mechanical (21, 56-59).  
361 Our data and that of Chihota and co-authors support the theory that LSDV does not

362 replicate in the insect (at least at detectable levels), but the retention of viral DNA in *Ae.*  
363 *aegypti* and *S. calcitrans* at levels similar to those acquired during feeding deserves further  
364 investigation (60).

365 Assessment of acquisition and retention of LSDV genome was performed in whole insect  
366 homogenates in our study, and further investigations into the location of virus within the  
367 insects were not possible. However an earlier study with *Ae. aegypti* (61) indicated that  
368 LSDV DNA persist longer in the head than in the thorax/abdomen. This is consistent with  
369 research that found myxoma virus was retained on the mouthparts of *Ae. aegypti*  
370 mosquitoes up to 28 days post feeding (62). The mechanism by which poxviruses persist for  
371 days on the mouthparts of vectors warrants further study.

372 The detection of LSDV in insect vectors in our study was based on the presence of viral DNA  
373 rather than infectious virus particles. Virus titration from homogenates of individual insects  
374 was attempted however we were able to detect live virus only from pooled homogenates of  
375 *S. calcitrans* and of *Ae. aegypti* (data not shown), suggesting low numbers of infectious  
376 virions are present on each insect. In previous work live LSDV was detected in individual *Ae.*  
377 *aegypti* for up to 6 days following exposure to an infectious calf (21), and live goatpox virus  
378 up to 4 days in *S. calcitrans* (59).

379 The aim of the present study was to use the results of feeding four model vector species on  
380 LSDV-infected cattle to estimate parameters related to transmission that were not possible  
381 with the data from previous studies. Given the large number of insects fed and tested  
382 (>3000), the resulting estimates for the probability of transmission from bovine to insect  
383 (including the relative risk of transmission from a subclinical animal and the dose-response)  
384 are robust, as indicated by the narrow credible intervals for these parameters (Tables 1 and

385 2). The estimates for the duration of virus retention (or, equivalently, the virus inactivation  
386 rate) are more uncertain (Table 1), which reflects difficulties in keeping insects alive to later  
387 days post feeding, especially *Cx. quinquefasciatus* (Figure S2).

388 Although not assessed in the present study, we used data from previous transmission  
389 experiments (21, 27) to estimate the probability of transmission of LSDV from insect to  
390 bovine. The small number of studies (and animals in each study) mean that the estimates  
391 for this parameter are uncertain, extremely so for *Ae. aegypti*, *Cx. quinquefasciatus* and *C.*  
392 *nubeculosus* (Table 1). This uncertainty is less important for *Cx. quinquefasciatus*, which is  
393 unlikely to be an important vector even if were able to transmit LSDV efficiently, but it  
394 makes it difficult to determine whether or not *C. nubeculosus* is likely be an important  
395 vector.

396 One previous study assessed the importance of different vector species by calculating  $R_0$  for  
397 LSDV from its component parameters (45), based on data from two studies by Chihota and  
398 co-authors (21, 29). Despite different values for the underlying parameters, both this and  
399 the present study obtained similar estimates of  $R_0$  for *S. calcitrans* (median: 15.5 vs 19.1)  
400 and for *Cx. quinquefasciatus* (median: 0.8 vs 0.6), suggesting the former is likely to be an  
401 important vector and the latter is likely to be an inefficient vector of LSDV. The estimates of  
402  $R_0$  for *Ae. aegypti* differed between the studies (median: 7.4 vs 2.4), due to differences in  
403 estimates for the mean duration of virus retention (11.2 vs 5.9) and probability of  
404 transmission from bovine to insect (0.90 vs 0.22). This suggests that *Ae. aegypti* (or other  
405 *Aedes* spp. for which it could be considered a model) may be less efficient vector than  
406 previously assumed. Finally, there was a major difference between the studies in their  
407 estimates of  $R_0$  for *C. nubeculosus*. The earlier study suggested this species is likely to be a

408 less efficient vector (median  $R_0=1.8$ ), but the present one suggests it could be an efficient  
409 one (median  $R_0=7.4$ ). This discrepancy is principally related to markedly different estimates  
410 for the mean duration of virus retention (0.01 days vs 2.4 days). Moreover, the estimate of  
411  $R_0$  for this species is highly uncertain, largely as a consequence of uncertainty in the  
412 estimate of the probability of transmission from insect to bovine (Table 1). *Culicoides* spp.  
413 are ubiquitous on cattle farms (63, 64) and, consequently, would represent a major  
414 transmission risk if they proved to be efficient vectors of LSDV. Hence, it is important that  
415 their ability to transmit virus to cattle is assessed.

416 Linking transmission experiments with mathematical modelling is an uncommon and  
417 powerful approach to create robust evidence which can inform policy makers involved in  
418 controlling the spread of infectious diseases. Here we have used this approach to investigate  
419 the transmission of LSDV, which has recently emerged as a significant threat to cattle in  
420 Africa, Asia and Europe. Our evidence indicates that *S. calcitrans* is likely to be an important  
421 vector species. It also suggests that *Culicoides* biting midges may be a more efficient vector  
422 species, than previously considered. Furthermore, we have demonstrated for the first time  
423 that subclinical infected cattle pose only very limited risk of onward transmission of LSDV to  
424 potential vectors. This evidence supports LSD control programmes which target clinically-  
425 affected cattle for rapid removal, rather than complete stamping-out of all cattle in an  
426 affected herd.

427 **Methods**

428 **Experimental design**

429 ***Ethical statement, housing and husbandry.*** The experimental study was conducted under  
430 the project license P2137C5BC from the UK Home Office according to the Animals (Scientific  
431 Procedures) Act 1986. The study was approved by the Pirbright Institute Animal Welfare and  
432 Ethical Review Board. Cattle were housed in the primary high containment animal facilities  
433 (Biosafety Level 3 Agriculture) at The Pirbright Institute. The husbandry of the animals  
434 during the study was described previously (9).

435 ***Challenge study and experimental procedures.*** Ten Holstein-Friesian male cattle (referred  
436 to as calves) were used for the study, which was done in two experimental replicates of five  
437 animals each. The median age and weight of the calves was 104 days old, 145 kg in replicate  
438 one and 124 days old, 176 kg in the second replicate. Eight calves were challenged by  
439 intravenous and intradermal inoculation with a suspension of LSDV containing  $10^6$  PFU/ml  
440 (9). More specifically, 2 ml were inoculated intravenously (jugular vein) and 1 ml was  
441 inoculated intradermally in four sites (0.25 ml in each site), two on each side of the neck.  
442 The remaining two calves were not challenged and were kept as non-inoculated in-contact  
443 controls. Calves were randomly assigned to either the control or challenge groups using a  
444 random number generator (excluding control calf 1, which was assigned as a control on  
445 welfare grounds following diagnosis with shipping fever pneumonia). The calves were kept  
446 for 21 days following the challenge; clinical scores were taken daily and serum, whole blood  
447 and skin biopsies (9) collected over the study period. The non-steroidal anti-inflammatory  
448 drug meloxicam (0.5 mg/kg body weight) (Metacam 20 mg/ml solution, Boehringer  
449 Ingelheim) was used when required on welfare grounds.

450 ***Insect exposure.*** Blood-feeding insects used in the study were: *Aedes aegypti* 'Liverpool'  
451 strain, *Culex quinquefasciatus* TPRI line (Tropical Pesticides Research Institute, obtained  
452 from the London School of Hygiene and Tropical Medicine, London, UK), *Stomoxys calcitrans*  
453 (colony established in 2011 from individuals kindly provided by the Mosquito and Fly  
454 Research Unit, USDA Florida) and *Culicoides nubeculosus* (65). All insects were reared at The  
455 Pirbright Institute under the following insectary conditions. *Ae. aegypti* were reared in pans  
456 of 300 larvae per pan, containing approximately 1 litre of water supplemented with fish  
457 food and housed at 28 °C, 70% relative humidity (RH) and 12:12 light/dark cycle. *Cx.*  
458 *quinquefasciatus* were reared in pans of 500-800 larvae per larval bowl, containing  
459 approximately 1.5 litre of water supplemented with ground guinea pig food and maintained  
460 at 26 °C, 50% RH and 16:8 light/dark cycle. *S. calcitrans* were reared in approximately 200  
461 eggs per pot, incubated for 12-13 days in larval pots containing a ratio of 3:2:1 (powdered  
462 grass meal, water and corn flour) and a table spoon of yeast. *C. nubeculosus* were reared in  
463 approximately 10,000 larvae per pan containing 2 litres of dechlorinated water  
464 supplemented with oxid broth and dried grass/wheat germ mix. Pots of 800 *Culicoides*  
465 pupae were made with males and females and allowed to emerge. Both *S. calcitrans* and *C.*  
466 *nubeculosus* were maintained in insectaries at  $27 \pm 2$  °C, 50% RH, with a 16:8 light/dark  
467 cycle.

468 The age and sex composition of the insects at exposure was: female and male *C.*  
469 *nubeculosus* between 0-2 days post-eclosion, female *Cx. quinquefasciatus* and *Ae. aegypti* at  
470 5-7 days post-eclosion and male and female *S. calcitrans* at an average of 4 days post-  
471 eclosion (range: 2-7 days). All adult insects were maintained on 10% sucrose and starved 18-  
472 24 hours before exposure to the calves.

473 All eight challenged calves, independent of clinical status, were exposed (for between 5 and  
474 20 minutes) to each of the four insect species on days 5, 7, 9, 11, 15, 17 and 19 post  
475 challenge. At each time point each pot of insects was placed on a cutaneous nodule on a  
476 clinical animal and a corresponding area of normal skin on a subclinical animal. The hair of  
477 the calf at each feeding site was clipped and/or shaved, and the insects were held in close  
478 contact with the skin of the calves in a container covered by a mesh. Around two hours after  
479 exposure, insects were anaesthetised under CO<sub>2</sub> and unfed individuals discarded and blood-  
480 engorged individuals collected.

481 For *Ae. aegypti*, *Cx. quinquefasciatus* and *C. nubeculosus* blood engorgement was assessed  
482 visually by the presence of blood in the abdominal cavity. However, *S. calcitrans* were all  
483 collected “blind” and blood engorgement was confirmed by the detection of the bovine  
484 cytochrome *b* gene using qPCR. Those individuals negative for cytochrome *b* at collection  
485 were removed from the analysis.

486 Samples from each insect group taken immediately following blood-feeding assessment (dpf  
487 0) were stored at -80C, and the rest of the insects were maintained for 1, 2, 4 or 8 dpf. After  
488 this incubation period, surviving individuals were collected and stored at -80 °C after the  
489 incubation period. Throughout incubation all insects were maintained on 10% sucrose  
490 solution, except *S. calcitrans* which were maintained with defibrinated horse blood (TCS  
491 Biosciences Ltd) after 2 dpf. All insects were kept in a temperature-controlled room at  
492 biocontainment level 3, with a 10:14 light/dark cycle. For the incubation, cardboard/waxed  
493 pots containing the insects were placed inside plastic boxes covered by a mesh which were  
494 kept under a plastic shelter to minimise temperature and humidity fluctuations.  
495 Temperature (mean: 24.8°C; range: 22.4°C – 26.4°C) and RH (mean: 35.9%; range: 18.5% –

496 48.9%) of the room and of the incubation area were recorded approximately every 15  
497 minutes (RF513, Comark Instruments and HOBO UX100-003, Onset).

498 **Samples.** Skin biopsies were weighed on a calibrated scale (EP613C Explorer Pro, OHAUS®)  
499 and homogenised in 500 µl high-glucose Dulbecco's modified Eagle's medium (41965, Life  
500 Technologies) supplemented with 5% foetal bovine serum (Antibody Production Services  
501 Ltd, Bedford, UK), 100 IU/ml penicillin and 100 µg/ml streptomycin (15140122, Life  
502 Technologies) and 2.5 µg/ml amphotericin B (15290026, Life Technologies) in a Lysing  
503 Matrix A tube (SKU 116910050-CF, MP Biomedicals) using a portable homogeniser (BeadBug  
504 Microtube Homogenizer, D1030, Benchmark Scientific Inc.). Whole insects were  
505 homogenised using a TissueLyser® (Qiagen, UK) with one or two steel beads of 3 mm (Dejay  
506 Distribution, UK) (66) in 200 µl Dulbecco's phosphate buffered saline (PBS, 14190094, Life  
507 Technologies), supplemented with penicillin-streptomycin and amphotericin B, as above.  
508 Bovine peripheral blood mononuclear cells (PBMC) were isolated from 7 ml of whole blood  
509 in EDTA diluted in PBS 1:1. The diluted blood was added to a SepMate™-50 centrifugation  
510 tube (Stemcell Technologies) under-layered with Histopaque®-1083 (Sigma-Aldrich). Tubes  
511 were centrifuged at 1500×g for 30 minutes, 20 °C with no brake. PBMCs were aspirated  
512 from the interface into PBS, washed three times with PBS at 1000×g for 10 minutes at 20 °C.  
513 After the final wash, cells were resuspended in 2 ml of RPMI medium (21875091, Life  
514 Technologies) supplemented with 10% foetal bovine serum, and penicillin-streptomycin as  
515 above. Blood collected without anticoagulants was allowed to clot, spun at 1000×g to  
516 2000×g for 10 minutes in a refrigerated centrifuge and the serum collected. All samples  
517 were stored at -80 °C until analysed.



518 **Laboratory assays.** Nucleic acid from 200 µl of whole blood, PBMC suspension, skin  
519 homogenate or 100 µl of insect homogenate was extracted in a 96-well plate with the  
520 MagMAX™ CORE Nucleic Acid Purification Kit (Applied Biosystems, A32700) using protocol A  
521 in a KingFisher™ Flex Magnetic Particle Processor (Applied Biosystems) and eluted in 50 µl of  
522 buffer. qPCR for LSDV ORF074 detection was performed using a modification of the TaqMan  
523 assay described by Bowden *et al.* (67) with the Path-ID™ qPCR Master Mix (Life Technologies  
524 #4388644). Briefly, a 20 µl reaction was prepared using 5 µl of template, 400 nM of each  
525 primer, 250 nM of the probe and nuclease-free water to the final volume. Samples were  
526 prepared in a 96-well plate and assayed using the Applied Biosystems™ 7500 Fast Real-Time  
527 PCR System with the program: 95 °C for 10 min, and 45 cycles of 95 °C for 15 s and 60 °C for  
528 60 s. Tissue culture derived LSDV positive controls were included in the extraction plates,  
529 and the copy number of LSDV genome were quantified using gBlocks® Gene Fragments  
530 (Integrated DNA Technologies) to generate the standard curve. The gBlocks® Gene  
531 Fragment included the target sequence of the Bowden assay for detection of LSDV ORF074  
532 (AAATGAAACCAATGGATGGGATACATAGTAAGAAAAATCAGGAAATCTATGAGCCATCCATTTTCC  
533 AACTCTATTCCATATACCGTTTT). Bovine blood intake by insects was determined using a SYBR  
534 green assay (PowerUp™ SYBR™ Green Master Mix, A25779, Life Technologies) for the  
535 detection of bovine mitochondrial *cytochrome b* as described by Van Der Saag *et al.* (68)  
536 with some modifications (forward primer: 5' GTAGACAAAGCAACCCTTAC at 300nM; reverse  
537 primer: 5' GGAGGAATAGTAGGTGGAC at 500nM) using the manufacturer cycling conditions  
538 for primers with T<sub>m</sub> >60 °C. The assay was performed in 10 µl reaction using 2 µl of  
539 template. This assay was specific for bovine *cytochrome b* and melt curve analysis was  
540 performed to confirm that only specific amplification occurred. For all qPCR assays a  
541 constant fluorescence threshold was set which produced a reproducible C<sub>q</sub> values for the

542 positive control samples between runs. A double antigen ELISA (ID Screen® Capripox, IDvet)  
543 was used to detect circulating antibodies for LSDV in serum samples following the  
544 manufacturer's protocol and analysed with the Multiskan FC Microplate photometer  
545 (Thermo Scientific™). Infectious virus titrations of PBMC suspension, insect and skin  
546 homogenate was performed by viral plaque quantification in MDBK cells.

#### 547 **Parameter estimation**

548 Full details of parameter estimation are provided in Text S1. Briefly:

549 ***Probability of transmission from bovine to insect and virus inactivation rate.*** The numbers  
550 of insects positive for viral DNA after feeding on cattle infected with LSDV were used to  
551 estimate the probability of transmission from bovine to insect and the virus inactivation  
552 rate. The probability that an insect would be positive when tested is

$$553 \quad p = \beta \exp(-\gamma t). \quad (1)$$

554 where  $\beta$  is the probability of transmission from bovine to insect,  $\gamma$  is the virus inactivation  
555 rate (i.e. the reciprocal of the mean duration of virus retention) and  $t$  is the time post  
556 feeding at which the insect was tested. Equation (1) combines the probability that an insect  
557 acquired virus ( $\beta$ ; i.e. the probability of transmission from bovine to insect) and the  
558 probability that the insect retained the virus until it was tested at  $t$  days post feeding ( $\exp(-$   
559  $\gamma t)$ ).

560 Differences amongst insect species in the virus inactivation rate and probability of  
561 transmission from bovine to insect and in the probability of transmission between  
562 subclinical and clinical animals were explored by comparing the fit of models in which these

563 parameters did or did not vary with species or clinical status of the donor cattle. In addition,  
564 the dose-response relationship was investigated by allowing the probability of transmission  
565 from bovine to insect to depend on the level of viral DNA (in either blood or skin) in the  
566 donor animal, so that,

$$567 \quad \log\left(\frac{\beta}{1-\beta}\right) = d_0 + d_1V, \quad (2)$$

568 where  $d_0$  and  $d_1$  are the dose-response parameters and  $V$  is the level of viral DNA ( $\log_{10}$   
569 copies/ml in blood or  $\log_{10}$  copies/mg in skin) in the donor when the insect fed. The  
570 different models were compared using the deviance information criterion (69). The two  
571 proxy measures for infectiousness (i.e. level of viral DNA in blood or skin) were compared by  
572 computing posterior predictive  $P$ -values for each insect.

573 ***Probability of transmission from insect to bovine.*** Data on transmission of LSDV from insect  
574 to bovine were extracted from the published literature (21, 27, 29). In these experiments,  
575 batches of insects (of the same species as used in the present study) were allowed to feed  
576 on an infected bovine and then to refeed at later time points on a naïve recipient. The  
577 probability of the recipient becoming infected is

$$578 \quad q = 1 - (1 - b\beta \exp(-\gamma T))^n, \quad (3)$$

579 where  $b$  is the probability of transmission from insect to bovine,  $\beta$  is the probability of  
580 transmission from bovine to insect,  $\gamma$  is the virus inactivation rate,  $T$  is the time interval  
581 between feeding on the donor and refeeding on the recipient and  $n$  is the number of insects  
582 which refeed. The probability, (3), is the probability that at least one insect (out of the  $n$   
583 refeeding) transmitted LSDV, where the probability that an individual insect will transmit is

584 the product of the probabilities that it acquired the virus during the initial feed ( $\theta$ ), retained  
585 it until refeeding ( $\exp(-\gamma T)$ ) and that it subsequently transmitted LSDV at refeeding ( $b$ ).

586 ***Latent and infectious periods in cattle.*** Previous estimates for the latent and infectious  
587 periods of LSDV (45) were updated using the data on detection of LSDV in blood and skin  
588 collected during the present and other recently published studies (27, 32). In addition, the  
589 proportion of cattle that develop clinical disease following challenge was estimated using  
590 data extracted from the published literature (27, 31, 32, 70, 71) and the present study.

591 ***Bayesian methods.*** Parameters were estimated using Bayesian methods. For all analyses,  
592 samples from the joint posterior distribution were generated using an adaptive Metropolis  
593 scheme (72), modified so that the scaling factor was tuned during burn-in to ensure an  
594 acceptance rate of between 20% and 40% for more efficient sampling of the target  
595 distribution (73). The adaptive Metropolis schemes were implemented in Matlab (version  
596 2019b; The Mathworks Inc.) and the code is available online at  
597 <https://github.com/SimonGubbins/LSDVAcquisitionAndRetentionByInsects>. Two chains  
598 were allowed to burn-in and then run to generate an effective sample size of around 5,000  
599 samples (assessed using the mcmcse package (74) in R (version 3.6.1 (75))). Convergence of  
600 the chains was assessed visually and using the Gelman-Rubin statistic provided in the coda  
601 package (76) in R (75). Different models for the variation amongst species in virus  
602 inactivation and probability of transmission from bovine to insect (Table S1) were compared  
603 using the deviance information criterion (69).

604 **Basic reproduction number for LSDV**

605 The basic reproduction number, denoted by  $R_0$ , is the “average number of secondary cases  
606 arising from the introduction of a single infected individual into an otherwise susceptible  
607 population” (44). The basic reproduction number for LSDV is,

$$608 \quad R_0 = \sqrt{\frac{b\beta m a^2}{(\mu + \gamma)} \left( p_c \frac{1}{r_c} + (1 - p_c) \rho \frac{1}{r_s} \right)}, \quad (4)$$

609 where  $b$  is the probability of transmission from insect to bovine,  $\beta$  is the probability of  
610 transmission from bovine to insect,  $\rho$  is the relative risk of transmission from a subclinical  
611 compared to a clinical bovine,  $\gamma$  is the virus inactivation rate,  $p_c$  is the proportion of cattle  
612 that develop clinical disease and  $1/r_c$  and  $1/r_s$  are the mean durations of infectiousness for  
613 clinical and subclinical animals, respectively, all of which were estimated in the present  
614 study, and  $a$ ,  $m$  and  $\mu$  are the biting rate, vector to host ratio and vector mortality rate,  
615 respectively. The formal derivation of this expression, (4), is given in Text S1.

616 Replicated Latin hypercube sampling was used to compute the median and 95% prediction  
617 interval for  $R_0$  for each insect species (45). Parameters were sampled either from their  
618 marginal posterior distributions derived in the present study ( $b$ ,  $\beta$ ,  $\rho$ ,  $\gamma$ ,  $p_c$ ,  $1/r_c$  and  $1/r_s$ ; see  
619 Tables 1 and S2) or uniformly from plausible ranges ( $a$ ,  $m$  and  $\mu$ ; see Gubbins (45), their  
620 Table 1). The mean duration of infection for clinical animals ( $1/r_c$ ) is based on detection of  
621 virus or viral DNA in skin, while that for subclinical animals ( $1/r_s$ ) is based on detection of  
622 viral DNA in blood (Table S2).

### 623 **Data availability**

624 The authors declare that the main data supporting the findings of this study are available  
625 within the article and its Supplementary Information files.

626 **Code availability**

627 The code and the data used are available online for readers to access with no restriction at  
628 [https://github.com/SimonGubbins/LSDVAcquisitionAndRetentionByInsects.](https://github.com/SimonGubbins/LSDVAcquisitionAndRetentionByInsects)

629 **Funding information**

630 This study was funded by the Biotechnology and Biological Sciences Research Council  
631 (BBSRC) [grant code: BB/R002606/1] and by MSD Animal Health. SB was supported by the  
632 Wellcome Trust (200171/Z/15/Z to LA); KED, SG, LA and PMB were supported by BBSRC  
633 strategic funding (BBS/E/I/00007033, BBS/E/I/00007037, BBS/E/I/00007038 and  
634 BBS/E/I/00007039).

635 **Conflict of interest**

636 None to report.

637 **Acknowledgements**

638 The authors are grateful to the Animal Services and the Non-Vesicular Reference Laboratory  
639 staff at The Pirbright Institute for their invaluable assistance in the running of the animal  
640 studies and sample assays, and to Dr. Lara Harrup for useful technical advice.

641 **Author contribution**

642 P.M.B., S.G., K.E.D., P.C.H., J.A. and A.J.W. conceptualised the study; B.S.B., L.A., S.B., C.S.  
643 and C.B. contributed to the design of the experiments. S.B., W.L., A.V.D., Z.L., E.D., J.S. and  
644 M.W. prepared the insects; B.S.B., P.M.B., I.R.H., N.W. and K.E.D. carried out the cattle  
645 experiments including collection and preparation of samples. B.S.B. performed the

646 laboratory assays and data acquisition. S.G. performed the statistical analysis and  
647 mathematical modelling. B.S.B., S.G. and P.M.B. drafted the paper. All authors discussed the  
648 results and commented on the manuscript.

649 **Figures**

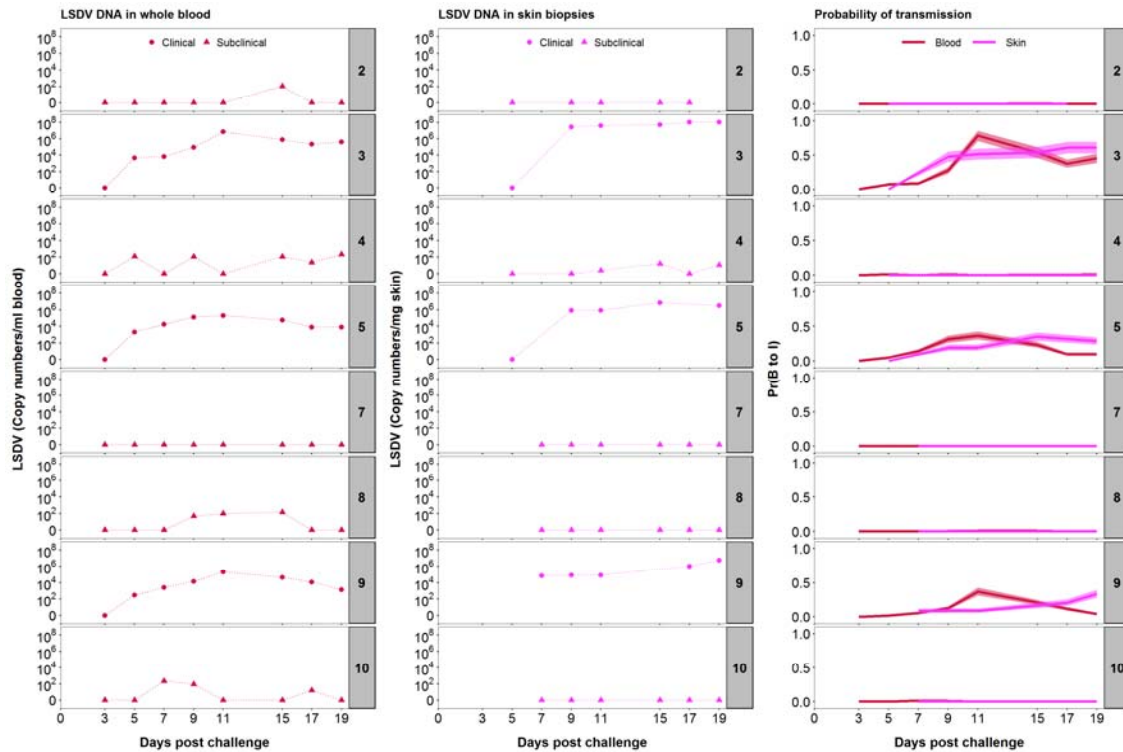

651 **Figure 1. LSDV inoculation of eight calves results in a spectrum of infectiousness.** Levels of  
652 viral DNA in blood ( $\log_{10}$  copies/ml; first column) and skin ( $\log_{10}$  copies/mg; second column)  
653 of the inoculated calves at different days post-challenge were quantified by qPCR. Based on  
654 the viral DNA levels in blood (red) or skin (magenta) the corresponding probability of  
655 transmission from bovine to insect (“infectiousness”) was calculated using a dose-response  
656 relationship (third column). Lines and shading show the posterior median and 95% credible  
657 intervals for the probability, respectively.

658

659



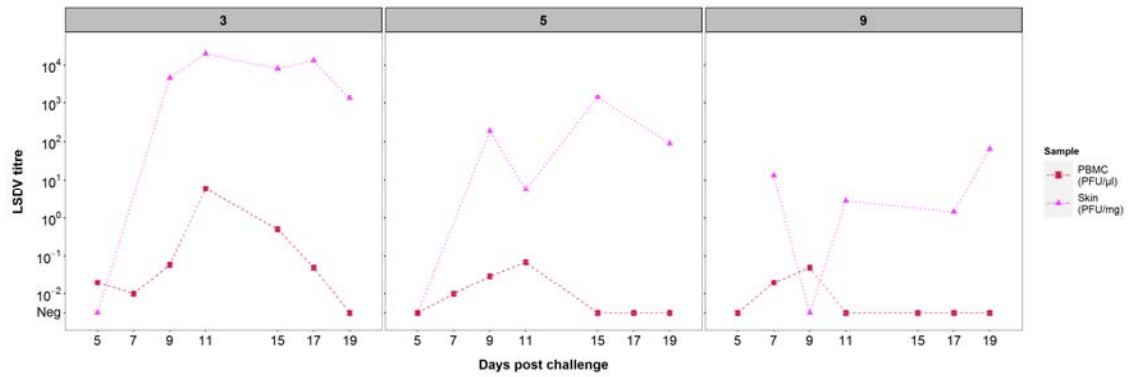

660

661 **Figure 2. LSDV titres vary between three clinical animals but are consistently higher in the**  
662 **skin compared to blood.** Levels of infectious lumpy skin disease virus (LSDV) in skin biopsies  
663 (PFU/mg of skin) (magenta triangles) and peripheral blood mononuclear cell (PBMC)  
664 fractions (PFU/μl suspension) (red stars) were quantified by titration on MDBK cells.  
665 Generalised skin lesions were first noted in all three animals at 7 days post challenge.

666

667

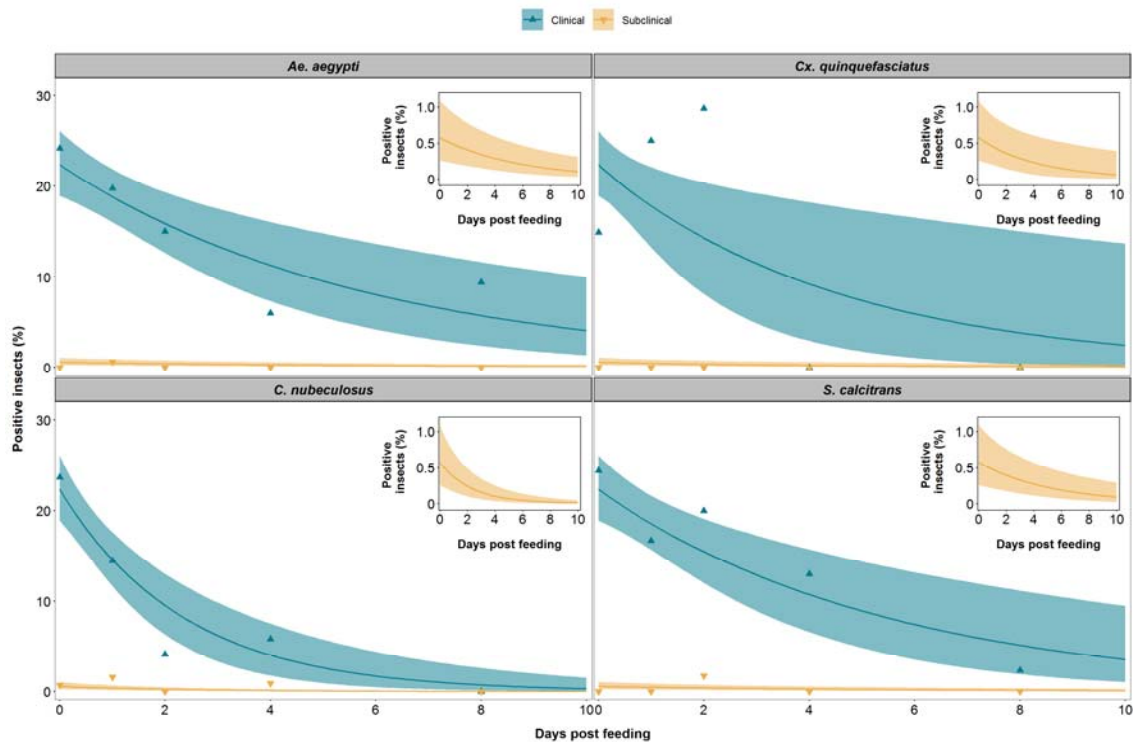

668

669 **Figure 3. LSDV is retained in blood-feeding insects for up to 8 days post feeding.** The  
670 proportion of blood-feeding insects positive for lumpy skin disease viral DNA after feeding  
671 on a clinical (green) or subclinically (yellow) animal is shown for the four species of insect:  
672 *Aedes aegypti*; *Culex quinquefasciatus*; *Culicoides nubeculosus*; and *Stomoxys calcitrans*.  
673 Each plot shows the observed proportion of positive insects (triangles) and the expected  
674 proportion of positive insects (posterior median (line), and 2.5th and 97.5th percentiles of  
675 the posterior distribution (shading)). The inset shows the expected proportion of positive  
676 insects after feeding on a subclinical animal using a graph with an expanded y-axis..

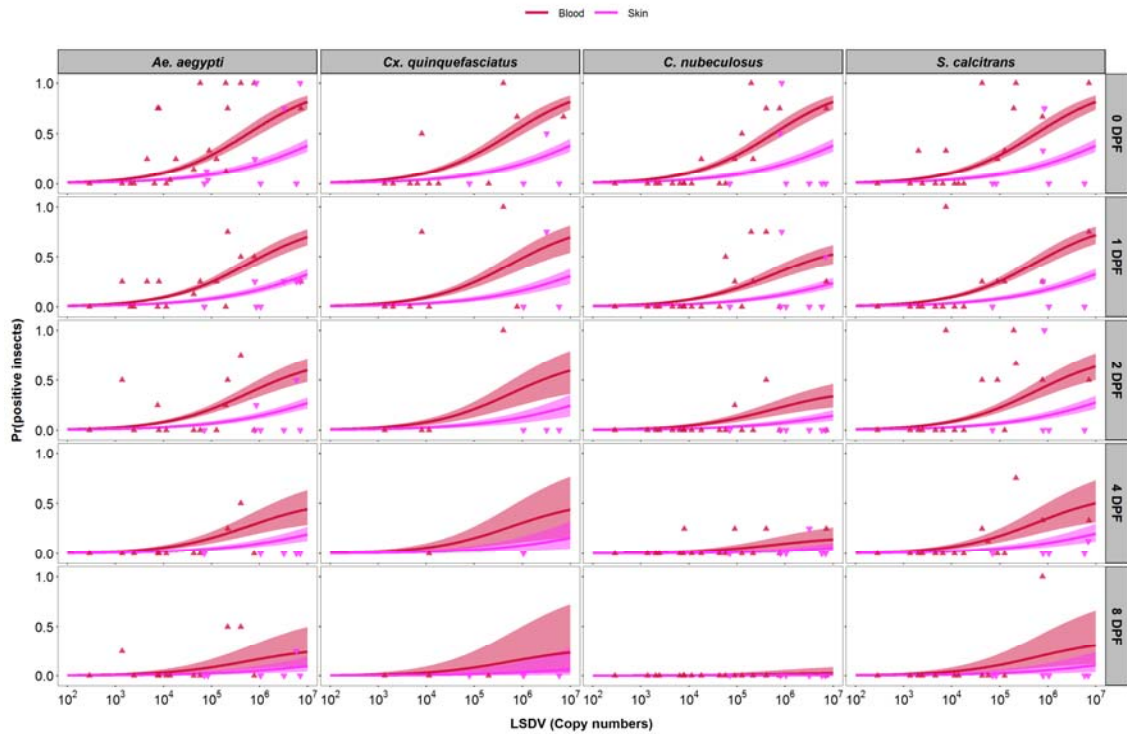

677

678 **Figure 4. Levels of lumpy skin disease viral DNA in blood or skin are proxy measures of**  
679 **infectiousness.** Each plot shows the dose-response relationship between the probability of  
680 an insect being positive for lumpy skin disease virus (LSDV) DNA and the level of viral DNA in  
681 the blood ( $\log_{10}$  copies/ml; red) or skin ( $\log_{10}$  copies/mg; magenta) of the calf on which they  
682 fed. Four species of insect, *Aedes aegypti* (first column), *Culex quinquefasciatus* (second  
683 column), *Culicoides nubeculosus* (third column) or *Stomoxys calcitrans* (fourth column) were  
684 tested at 0, 1, 2, 4 and 8 days post feeding (rows). Plots show the observed proportion of  
685 positive insects (blood: red up triangles; skin: magenta down triangles) and the estimated  
686 probability of an insect being positive (posterior median (line) and 2.5th and 97.5th  
687 percentiles of the posterior distribution (shading: blood, red; skin: magenta)).

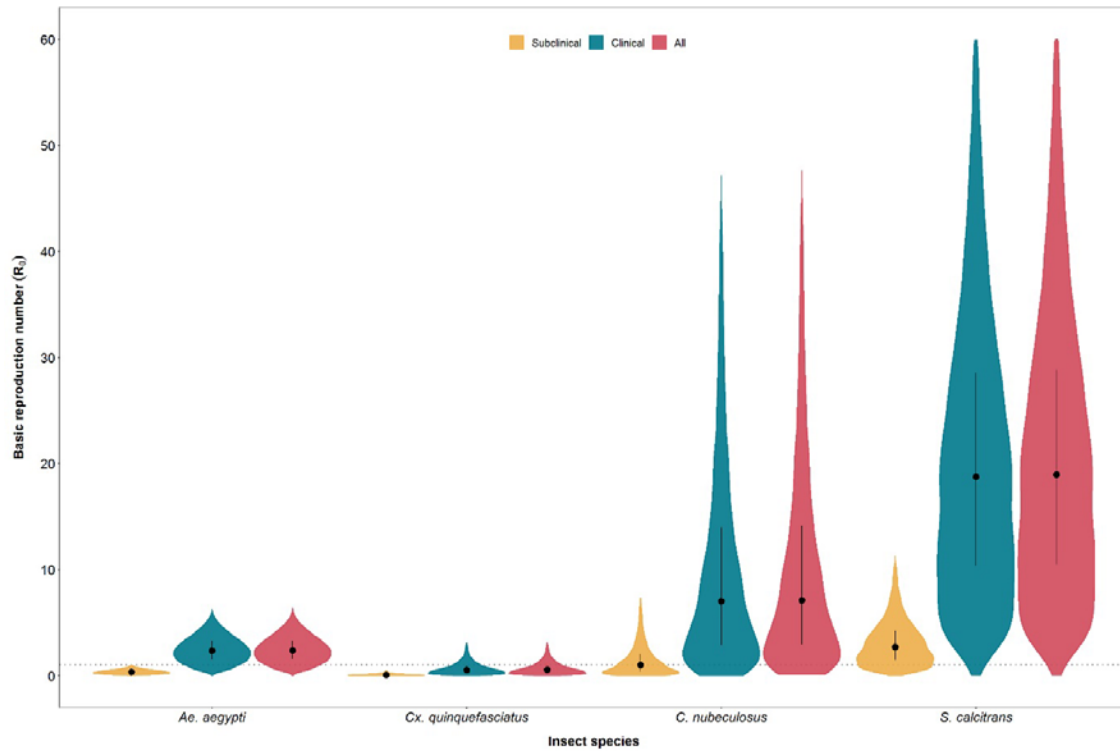

688

689 **Figure 5. Basic reproduction number ( $R_0$ ) for lumpy skin disease virus (LSDV) in calves**  
690 **when transmitted by *Aedes aegypti*, *Culex quinquefasciatus*, *Culicoides nubeculosus* or**  
691 ***Stomoxys calcitrans*.** For each species,  $R_0$  was calculated for subclinical calves only (yellow),  
692 clinical calves only (green) and both combined (red). Violin plots show the posterior median  
693 (black circle), interquartile range (black vertical line) and density (shape) for  $R_0$  based on  
694 replicated Latin hypercube sampling (100 replicates with the range for each parameter  
695 subdivided into 100 steps).

696

697 **Tables**

698 **Table 1.** Parameters for the transmission of lumpy skin disease virus by four species of biting  
699 insect.

| parameter                                                                     | symbol      | estimate*            |
|-------------------------------------------------------------------------------|-------------|----------------------|
| probability of transmission from bovine to insect†                            |             |                      |
| clinical donor                                                                | $\beta$     | 0.22 (0.19, 0.26)    |
| subclinical donor                                                             | $\rho\beta$ | 0.006 (0.003, 0.011) |
| relative risk of transmission from a subclinical compared to clinical bovine† |             |                      |
|                                                                               | $\rho$      | 0.03 (0.01, 0.05)    |
| virus inactivation rate (/day)                                                |             |                      |
| <i>Ae. aegypti</i>                                                            |             | 0.17 (0.07, 0.29)    |
| <i>Cx. quinquefasciatus</i>                                                   |             | 0.22 (0.05, 0.51)    |
| <i>C. nubeculosus</i>                                                         |             | 0.42 (0.26, 0.64)    |
| <i>S. calcitrans</i>                                                          |             | 0.18 (0.08, 0.31)    |
| mean duration of virus retention (days)                                       |             |                      |
|                                                                               | $1/\gamma$  |                      |
| <i>Ae. aegypti</i>                                                            |             | 5.9 (3.5, 13.4)      |
| <i>Cx. quinquefasciatus</i>                                                   |             | 4.5 (2.0, 22.0)      |
| <i>C. nubeculosus</i>                                                         |             | 2.4 (1.6, 3.9)       |
| <i>S. calcitrans</i>                                                          |             | 5.5 (3.2, 12.3)      |
| probability of transmission from insect to bovine                             |             |                      |
|                                                                               | $b$         |                      |
| <i>Ae. aegypti</i>                                                            |             | 0.56 (0.11, 0.98)    |
| <i>Cx. quinquefasciatus</i>                                                   |             | 0.11 (0.004, 0.73)   |
| <i>C. nubeculosus</i>                                                         |             | 0.19 (0.007, 0.91)   |
| <i>S. calcitrans</i>                                                          |             | 0.05 (0.02, 0.15)    |
| basic reproduction number                                                     |             |                      |
|                                                                               | $R_0$       |                      |
| <i>Ae. aegypti</i>                                                            |             | 2.41 (0.50, 5.22)    |
| <i>Cx. quinquefasciatus</i>                                                   |             | 0.55 (0.06, 2.37)    |
| <i>C. nubeculosus</i>                                                         |             | 7.09 (0.24, 37.10)   |
| <i>S. calcitrans</i>                                                          |             | 19.09 (2.73, 57.03)  |

700 \* posterior median (95% credible interval)

701 † parameter does not differ amongst species

702 **Table 2.** Parameters for the dose-response relationship between levels of viral DNA in blood  
703 or skin and the probability of transmission of lumpy skin disease virus from bovine to insect.

| parameter                       | estimate*                   |                            |
|---------------------------------|-----------------------------|----------------------------|
|                                 | level of viral DNA in blood | level of viral DNA in skin |
| <i>dose-response parameters</i> |                             |                            |
| intercept ( $d_0$ )             | -6.89 (-7.74, -6.11)        | -6.70 (-7.81, -5.76)       |
| slope ( $d_1$ )                 | 1.20 (1.03, 1.38)           | 0.89 (0.75, 1.06)          |

704 \* posterior median (95% credible interval)

705 **Supporting information**

706 **Data S1.** Clinical observations and levels of viral DNA and infectious virus in samples taken  
707 from calves infected with lumpy skin disease virus and the outcome when blood-feeding  
708 insects were allowed to feed on them.

709 **Figure S1.** Clinical characterisation of experimental challenge of cattle with lumpy skin  
710 disease virus.

711 **Figure S2.** A higher proportion of insects are positive for lumpy skin disease viral DNA after  
712 feeding on a clinical compared to a subclinical animal.

713 **Figure S3.** The proportion of blood-feeding insects positive for lumpy skin disease viral DNA  
714 differs over time post challenge.

715 **Figure S4.** The median amount of lumpy skin disease viral DNA in homogenised whole  
716 insects was the same over time post feeding in three out of four species tested.

717 **Table S1.** Deviance information criterion (DIC) for models assessing variation amongst insect  
718 species in the virus inactivation rate, the probability of transmission of lumpy skin disease  
719 virus from bovine to insect and the relative risk of transmission from a subclinical bovine.

720 **Table S2.** Parameters for the duration of latent and infectious periods for lumpy skin disease  
721 virus in cattle.

722 **Text S1.** Modelling the transmission of lumpy skin disease virus by haematophagus insects.

723 **References**

724

725 1. Tuppurainen ES, Oura CA. 2012. Review: lumpy skin disease: an emerging threat to  
726 Europe, the Middle East and Asia. *Transbound Emerg Dis* 59:40-8.

727 2. Tasioudi KE, Antoniou SE, Iliadou P, Sachpatzidis A, Plevraki E, Agianniotaki EI, Fouki  
728 C, Mangana-Vougiouka O, Chondrokouki E, Dile C. 2016. Emergence of Lumpy Skin  
729 Disease in Greece, 2015. *Transbound Emerg Dis* 63:260-5.

730 3. Sameea Yousefi P, Mardani K, Dalir-Naghadeh B, Jalilzadeh-Amin G. 2017.  
731 Epidemiological Study of Lumpy Skin Disease Outbreaks in North-western Iran.  
732 *Transbound Emerg Dis* 64:1782-1789.

733 4. Sevik M, Dogan M. 2017. Epidemiological and Molecular Studies on Lumpy Skin  
734 Disease Outbreaks in Turkey during 2014-2015. *Transbound Emerg Dis* 64:1268-  
735 1279.

736 5. OIE. World Animal Health Information Database (WAHIS Interface).  
737 [https://www.oie.int/wahis\\_2/public/wahid.php/Diseaseinformation/lmmsummary](https://www.oie.int/wahis_2/public/wahid.php/Diseaseinformation/lmmsummary).  
738 Accessed

739 6. Beard PM. 2016. Lumpy skin disease: a direct threat to Europe. *Vet Rec* 178:557-8.

740 7. Mercier A, Arsevska E, Bournez L, Bronner A, Calavas D, Cauchard J, Falala S, Caufour  
741 P, Tisseuil C, Lefrancois T, Lancelot R. 2018. Spread rate of lumpy skin disease in the  
742 Balkans, 2015-2016. *Transbound Emerg Dis* 65:240-243.



- 743 8. Sprygin A, Artyuchova E, Babin Y, Prutnikov P, Kostrova E, Byadovskaya O, Kononov  
744 A. 2018. Epidemiological characterization of lumpy skin disease outbreaks in Russia  
745 in 2016. *Transbound Emerg Dis* 65:1514-1521.
- 746 9. Sanz-Bernardo B, Haga IR, Wijesiriwardana N, Hawes PC, Simpson J, Morrison LR,  
747 MacIntyre N, Brocchi E, Atkinson J, Haegeman A, De Clercq K, Darpel KE, Beard PM.  
748 2020. Lumpy Skin Disease Is Characterized by Severe Multifocal Dermatitis With  
749 Necrotizing Fibrinoid Vasculitis Following Experimental Infection. *Vet Pathol* 57:388-  
750 396.
- 751 10. Elhaig MM, Selim A, Mahmoud M. 2017. Lumpy skin disease in cattle: Frequency of  
752 occurrence in a dairy farm and a preliminary assessment of its possible impact on  
753 Egyptian buffaloes. *Onderstepoort J Vet Res* 84:e1-e6.
- 754 11. Abutarbush SM, Ababneh MM, Al Zoubi IG, Al Sheyab OM, Al Zoubi MG, Alekish MO,  
755 Al Gharabat RJ. 2015. Lumpy Skin Disease in Jordan: Disease Emergence, Clinical  
756 Signs, Complications and Preliminary-associated Economic Losses. *Transbound*  
757 *Emerg Dis* 62:549-54.
- 758 12. Al-Salihi KA, Hassan IQ. 2015. Lumpy Skin Disease in Iraq: Study of the Disease  
759 Emergence. *Transbound Emerg Dis* 62:457-62.
- 760 13. Ochwo S, VanderWaal K, Munsey A, Ndekezi C, Mwebe R, Okurut ARA, Nantima N,  
761 Mwiine FN. 2018. Spatial and temporal distribution of lumpy skin disease outbreaks  
762 in Uganda (2002-2016). *BMC Vet Res* 14:174.

- 763 14. Limon G, Gamawa AA, Ahmed AI, Lyons NA, Beard PM. 2020. Epidemiological  
764 Characteristics and Economic Impact of Lumpy Skin Disease, Sheeppox and Goatpox  
765 Among Subsistence Farmers in Northeast Nigeria. *Front Vet Sci* 7:8.
- 766 15. Gari G, Bonnet P, Roger F, Waret-Szkuta A. 2011. Epidemiological aspects and  
767 financial impact of lumpy skin disease in Ethiopia. *Prev Vet Med* 102:274-83.
- 768 16. Molla W, de Jong MCM, Gari G, Frankena K. 2017. Economic impact of lumpy skin  
769 disease and cost effectiveness of vaccination for the control of outbreaks in Ethiopia.  
770 *Prev Vet Med* 147:100-107.
- 771 17. Casal J, Allepuz A, Miteva A, Pite L, Tabakovsky B, Terzievski D, Alexandrov T, Beltran-  
772 Alcrudo D. 2018. Economic cost of lumpy skin disease outbreaks in three Balkan  
773 countries: Albania, Bulgaria and the Former Yugoslav Republic of Macedonia (2016-  
774 2017). *Transbound Emerg Dis* 65:1680-1688.
- 775 18. Kahana-Sutin E, Klement E, Lensky I, Gottlieb Y. 2017. High relative abundance of the  
776 stable fly *Stomoxys calcitrans* is associated with lumpy skin disease outbreaks in  
777 Israeli dairy farms. *Med Vet Entomol* 31:150-160.
- 778 19. Yeruham I, Nir O, Braverman Y, Davidson M, Grinstein H, Haymovitch M, Zamir O.  
779 1995. Spread of lumpy skin disease in Israeli dairy herds. *Vet Rec* 137:91-3.
- 780 20. Magori-Cohen R, Louzoun Y, Herziger Y, Oron E, Arazi A, Tuppurainen E, Shpigel NY,  
781 Klement E. 2012. Mathematical modelling and evaluation of the different routes of  
782 transmission of lumpy skin disease virus. *Vet Res* 43:1.

- 783 21. Chihota CM, Rennie LF, Kitching RP, Mellor PS. 2001. Mechanical transmission of  
784 lumpy skin disease virus by *Aedes aegypti* (Diptera: Culicidae). *Epidemiol Infect*  
785 126:317-21.
- 786 22. Tuppurainen ES, Lubinga JC, Stoltz WH, Troskie M, Carpenter ST, Coetzer JA, Venter  
787 EH, Oura CA. 2013. Mechanical transmission of lumpy skin disease virus by  
788 *Rhipicephalus appendiculatus* male ticks. *Epidemiol Infect* 141:425-30.
- 789 23. Lubinga JC, Tuppurainen ES, Coetzer JA, Stoltz WH, Venter EH. 2014. Transovarial  
790 passage and transmission of LSDV by *Amblyomma hebraeum*, *Rhipicephalus*  
791 *appendiculatus* and *Rhipicephalus decoloratus*. *Exp Appl Acarol* 62:67-75.
- 792 24. Lubinga JC, Clift SJ, Tuppurainen ES, Stoltz WH, Babiuk S, Coetzer JA, Venter EH.  
793 2014. Demonstration of lumpy skin disease virus infection in *Amblyomma hebraeum*  
794 and *Rhipicephalus appendiculatus* ticks using immunohistochemistry. *Ticks Tick*  
795 *Borne Dis* 5:113-20.
- 796 25. Tuppurainen ES, Lubinga JC, Stoltz WH, Troskie M, Carpenter ST, Coetzer JA, Venter  
797 EH, Oura CA. 2013. Evidence of vertical transmission of lumpy skin disease virus in  
798 *Rhipicephalus decoloratus* ticks. *Ticks Tick Borne Dis* 4:329-33.
- 799 26. Lubinga JC, Tuppurainen ES, Mahlare R, Coetzer JA, Stoltz WH, Venter EH. 2015.  
800 Evidence of transstadial and mechanical transmission of lumpy skin disease virus by  
801 *Amblyomma hebraeum* ticks. *Transbound Emerg Dis* 62:174-82.
- 802 27. Sohier C, Haegeman A, Mostin L, De Leeuw I, Campe WV, De Vleeschouwer A,  
803 Tuppurainen ESM, van den Berg T, De Regge N, De Clercq K. 2019. Experimental

- 804 evidence of mechanical lumpy skin disease virus transmission by *Stomoxys calcitrans*  
805 biting flies and *Haematopota* spp. horseflies. *Sci Rep* 9:20076.
- 806 28. Issimov A, Kutumbetov L, Orynbayev MB, Khairullin B, Myrzakhmetova B,  
807 Sultankulova K, White PJ. 2020. Mechanical Transmission of Lumpy Skin Disease  
808 Virus by *Stomoxys* Spp (*Stomoxys Calsitrans*, *Stomoxys Sitiens*, *Stomoxys Indica*),  
809 Diptera: Muscidae. *Animals (Basel)* 10.
- 810 29. Chihota CM, Rennie LF, Kitching RP, Mellor PS. 2003. Attempted mechanical  
811 transmission of lumpy skin disease virus by biting insects. *Med Vet Entomol* 17:294-  
812 300.
- 813 30. Sprygin A, Pestova Y, Wallace DB, Tuppurainen E, Kononov AV. 2019. Transmission of  
814 lumpy skin disease virus: A short review. *Virus Res* 269:197637.
- 815 31. Tuppurainen ES, Venter EH, Coetzer JA. 2005. The detection of lumpy skin disease  
816 virus in samples of experimentally infected cattle using different diagnostic  
817 techniques. *Onderstepoort J Vet Res* 72:153-64.
- 818 32. Moller J, Moritz T, Schlottau K, Krstevski K, Hoffmann D, Beer M, Hoffmann B. 2019.  
819 Experimental lumpy skin disease virus infection of cattle: comparison of a field strain  
820 and a vaccine strain. *Arch Virol* 164:2931-2941.
- 821 33. Irons PC, Tuppurainen ES, Venter EH. 2005. Excretion of lumpy skin disease virus in  
822 bull semen. *Theriogenology* 63:1290-7.
- 823 34. Annandale CH, Smuts MP, Ebersohn K, du Plessis L, Thompson PN, Venter EH, Stout  
824 TAE. 2019. Effect of using frozen-thawed bovine semen contaminated with lumpy

- 825 skin disease virus on in vitro embryo production. *Transbound Emerg Dis* 66:1539-  
826 1547.
- 827 35. Rouby S, Aboulsoud E. 2016. Evidence of intrauterine transmission of lumpy skin  
828 disease virus. *Vet J* 209:193-5.
- 829 36. Annandale CH, Holm DE, Ebersohn K, Venter EH. 2014. Seminal transmission of  
830 lumpy skin disease virus in heifers. *Transbound Emerg Dis* 61:443-8.
- 831 37. Manic M, Stojiljkovic M, Petrovic M, Nisavic J, Bacic D, Petrovic T, Vidanovic D,  
832 Obrenovic S. 2019. Epizootic features and control measures for lumpy skin disease in  
833 south-east Serbia in 2016. *Transbound Emerg Dis* 66:2087-2099.
- 834 38. EFSA Panel on Animal Health Welfare. 2016. Urgent advice on lumpy skin disease.  
835 *EFSA Journal* 14:e04573.
- 836 39. Krenn HW, Aspöck H. 2012. Form, function and evolution of the mouthparts of  
837 blood-feeding Arthropoda. *Arthropod Struct Dev* 41:101-18.
- 838 40. Tchouassi DP, Okiro RO, Sang R, Cohnstaedt LW, McVey DS, Torto B. 2016. Mosquito  
839 host choices on livestock amplifiers of Rift Valley fever virus in Kenya. *Parasit Vectors*  
840 9:184.
- 841 41. Hasegawa M, Tuno N, Yen NT, Nam VS, Takagi M. 2008. Influence of the distribution  
842 of host species on adult abundance of Japanese encephalitis vectors *Culex vishnui*  
843 subgroup and *Culex gelidus* in a rice-cultivating village in northern Vietnam. *Am J*  
844 *Trop Med Hyg* 78:159-68.

- 845 42. Tomazatos A, Jost H, Schulze J, Spinu M, Schmidt-Chanasit J, Cadar D, Luhken R.  
846 2020. Blood-meal analysis of *Culicoides* (Diptera: Ceratopogonidae) reveals a broad  
847 host range and new species records for Romania. *Parasit Vectors* 13:79.
- 848 43. Augot D, Hadj-Henni L, Strutz SE, Slama D, Millot C, Depaquit J, Millot JM. 2017.  
849 Association between host species choice and morphological characters of main  
850 sensory structures of *Culicoides* in the Palaearctic region. *PeerJ* 5:e3478.
- 851 44. Keeling MJ, Rohani P. 2008. *Modeling Infectious Diseases in Humans and Animals*  
852 doi:10.2307/j.ctvc4gk0. Princeton University Press.
- 853 45. Gubbins S. 2019. Using the basic reproduction number to assess the risk of  
854 transmission of lumpy skin disease virus by biting insects. *Transboundary and*  
855 *Emerging Diseases* 66:1873-1883.
- 856 46. Fraser C, Riley S, Anderson RM, Ferguson NM. 2004. Factors that make an infectious  
857 disease outbreak controllable. *Proc Natl Acad Sci U S A* 101:6146-51.
- 858 47. Charleston B, Bankowski BM, Gubbins S, Chase-Topping ME, Schley D, Howey R,  
859 Barnett PV, Gibson D, Juleff ND, Woolhouse ME. 2011. Relationship between clinical  
860 signs and transmission of an infectious disease and the implications for control.  
861 *Science* 332:726-9.
- 862 48. Duong V, Lambrechts L, Paul RE, Ly S, Lay RS, Long KC, Huy R, Tarantola A, Scott TW,  
863 Sakuntabhai A, Buchy P. 2015. Asymptomatic humans transmit dengue virus to  
864 mosquitoes. *Proc Natl Acad Sci U S A* 112:14688-93.

- 865 49. Tadesse FG, Slater HC, Chali W, Teelen K, Lanke K, Belachew M, Menberu T, Shumie  
866 G, Shitaye G, Okell LC, Graumans W, van Gemert GJ, Kedir S, Tesfaye A, Belachew F,  
867 Abebe W, Mamo H, Sauerwein R, Balcha T, Aseffa A, Yewhalaw D, Gadisa E, Drakeley  
868 C, Bousema T. 2018. The Relative Contribution of Symptomatic and Asymptomatic  
869 Plasmodium vivax and Plasmodium falciparum Infections to the Infectious Reservoir  
870 in a Low-Endemic Setting in Ethiopia. *Clin Infect Dis* 66:1883-1891.
- 871 50. Harris RL, Miller JA, Frazar ED. 1974. Horn Flies and Stable Flies - Feeding Activity.  
872 *Annals of the Entomological Society of America* 67:891-894.
- 873 51. Baldacchino F, Muenworn V, Desquesnes M, Desoli F, Charoenviriyaphap T, Duvallet  
874 G. 2013. Transmission of pathogens by Stomoxys flies (Diptera, Muscidae): a review.  
875 *Parasite* 20:26.
- 876 52. Mullen GR, Murphree CS. 2019. Chapter 13 - Biting Midges (Ceratopogonidae), p  
877 213-236. *In* Mullen GR, Durden LA (ed), *Medical and Veterinary Entomology* (Third  
878 Edition) doi:<https://doi.org/10.1016/B978-0-12-814043-7.00013-3>. Academic Press.
- 879 53. Ramasubramanian MK, Barham OM, Swaminathan V. 2008. Mechanics of a mosquito  
880 bite with applications to microneedle design. *Bioinspiration & Biomimetics* 3.
- 881 54. Scott TW, Takken W. 2012. Feeding strategies of anthropophilic mosquitoes result in  
882 increased risk of pathogen transmission. *Trends Parasitol* 28:114-21.
- 883 55. Santana SR, Andrade PDS, Urbinatti PR, Almeida R, Lima-Camara TN. 2019.  
884 Gonotrophic discordance in *Culex quinquefasciatus* (Diptera: Culicidae) in the city of  
885 Sao Paulo, Brazil. *Rev Soc Bras Med Trop* 53:e20190277.

- 886 56. Kitching RP, Mellor PS. 1986. Insect transmission of capripoxvirus. *Res Vet Sci*  
887 40:255-8.
- 888 57. Fenner F, Day MF, Woodroffe GM. 1952. The mechanism of the transmission of  
889 myxomatosis in the European rabbit (*Oryctolagus cuniculus*) by the mosquito *Aedes*  
890 *aegypti*. *Aust J Exp Biol Med Sci* 30:139-52.
- 891 58. Kligler IJ, Muckenfuss RS, Rivers TM. 1929. Transmission of Fowl-Pox by Mosquitoes.  
892 *J Exp Med* 49:649-60.
- 893 59. Mellor PS, Kitching RP, Wilkinson PJ. 1987. Mechanical transmission of capripox virus  
894 and African swine fever virus by *Stomoxys calcitrans*. *Res Vet Sci* 43:109-12.
- 895 60. Gray SM, Banerjee N. 1999. Mechanisms of arthropod transmission of plant and  
896 animal viruses. *Microbiol Mol Biol Rev* 63:128-48.
- 897 61. Chihota CM. 2000. The role of arthropod vectors in the epidemiology of lumpy skin  
898 disease. Degree of Doctor of Philosophy. University of Reading.
- 899 62. Day MF, Fenner F, Woodroffe GM, McIntyre GA. 1956. Further studies on the  
900 mechanism of mosquito transmission of myxomatosis in the European rabbit. *J Hyg*  
901 (Lond) 54:258-83.
- 902 63. Lassen SB, Nielsen SA, Kristensen M. 2012. Identity and diversity of blood meal hosts  
903 of biting midges (Diptera: Ceratopogonidae: *Culicoides* Latreille) in Denmark. *Parasit*  
904 *Vectors* 5:143.



- 905 64. Purse BV, Carpenter S, Venter GJ, Bellis G, Mullens BA. 2015. Bionomics of temperate  
906 and tropical *Culicoides* midges: knowledge gaps and consequences for transmission  
907 of *Culicoides*-borne viruses. *Annu Rev Entomol* 60:373-92.
- 908 65. Boorman J. 1974. The maintenance of laboratory colonies of *Culicoides variipennis*  
909 (*Coq.*), *C. nubeculosus* (*Mg.*) and *C. riethi* *Kieff.* (*Diptera*, *Ceratopogonidae*). *Bulletin*  
910 *of Entomological Research* 64:371-377.
- 911 66. Veronesi E, Mertens PP, Shaw AE, Brownlie J, Mellor PS, Carpenter ST. 2008.  
912 Quantifying bluetongue virus in adult *Culicoides* biting midges (*Diptera*:  
913 *Ceratopogonidae*). *J Med Entomol* 45:129-32.
- 914 67. Bowden TR, Babiuk SL, Parkyn GR, Copps JS, Boyle DB. 2008. Capripoxvirus tissue  
915 tropism and shedding: A quantitative study in experimentally infected sheep and  
916 goats. *Virology* 371:380-93.
- 917 68. MR VDS, Gu X, Ward MP, Kirkland PD. 2016. Development and evaluation of real-  
918 time PCR assays for bloodmeal identification in *Culicoides* midges. *Med Vet Entomol*  
919 30:155-65.
- 920 69. Spiegelhalter DJ, Best NG, Carlin BP, Van Der Linde A. 2002. Bayesian measures of  
921 model complexity and fit. *Journal of the Royal Statistical Society: Series B (Statistical*  
922 *Methodology)* 64:583-639.
- 923 70. Carn VM, Kitching RP. 1995. An investigation of possible routes of transmission of  
924 lumpy skin disease virus (*Neethling*). *Epidemiol Infect* 114:219-26.

- 925 71. Babiuk S, Bowden TR, Parkyn G, Dalman B, Manning L, Neufeld J, Embury-Hyatt C,  
926 Cops J, Boyle DB. 2008. Quantification of lumpy skin disease virus following  
927 experimental infection in cattle. *Transbound Emerg Dis* 55:299-307.
- 928 72. Haario H, Saksman E, Tamminen J. 2001. An adaptive Metropolis algorithm. *Bernoulli*  
929 7:223-242.
- 930 73. Andrieu C, Thoms J. 2008. A tutorial on adaptive MCMC. *Statistics and Computing*  
931 18:343-373.
- 932 74. Flegal JM, Hughes J, Vats D, Dai N. 2017. mcmcse: Monte Carlo Standard Errors for  
933 MCMC. R Package version 1.3-2.,
- 934 75. Wallace DB, Weyer J, Nel LH, Viljoen GJ. 2007. Improved method for the generation  
935 and selection of homogeneous lumpy skin disease virus (SA-Neethling)  
936 recombinants. *J Virol Methods* 146:52-60.
- 937 76. Plummer M, Best N, Cowles K, Vines K. 2006. CODA: convergence diagnosis and  
938 output analysis for MCMC. *R News* 6:7-11.
